# Supplementary material for: A facile method for the fast and accurate selection of a UF membrane for membrane bioreactors
Source: Royal Society of Chemistry journal article supplement (doi:10.1039/d1ew00309g), 2021-01-01
Supplement: d1ew00309g1.pdf [file d1ew00309g1.pdf]

## A Facile Method for the Fast and Accurate Selection of UF Membrane for Membrane Bioreactor

Zhengtao Li <sup>a</sup>, Wee Tio <sup>a</sup> and Darren D. Sun\* <sup>a</sup>

<sup>a</sup>. School of Civil and Environmental Engineering, Nanyang Technological University, 50 Nanyang Avenue, Singapore 639798.

### Supplementary Information

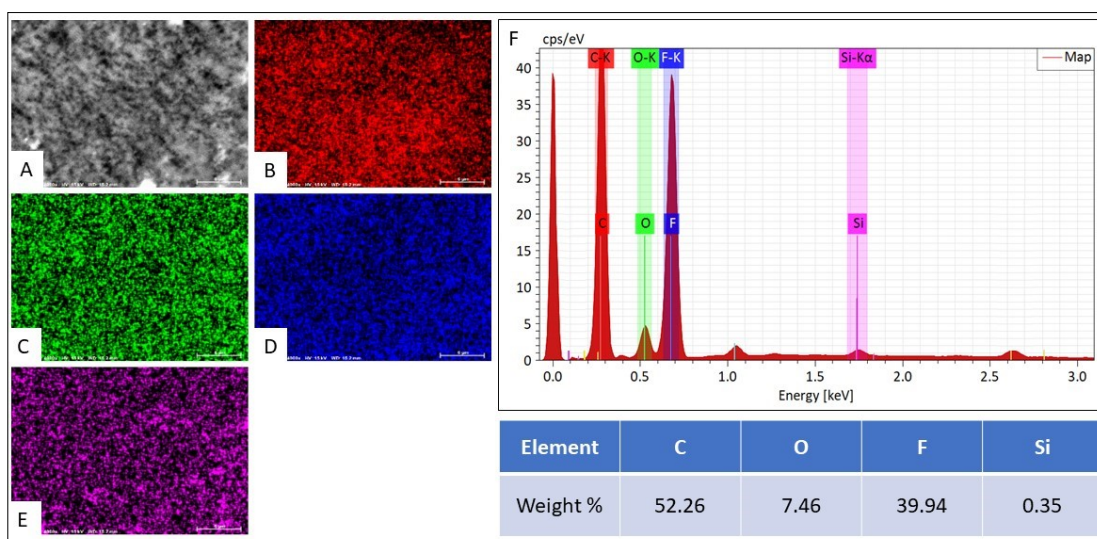

Figure S1 EDX Results of MS Membrane. A. SEM image; B. Carbon(C) Element Mapping; C. Oxygen(O) Element Mapping; D. Fluoride(F) Element Mapping; E. Silicon(Si) Element Mapping; F. EDX Spectrum.

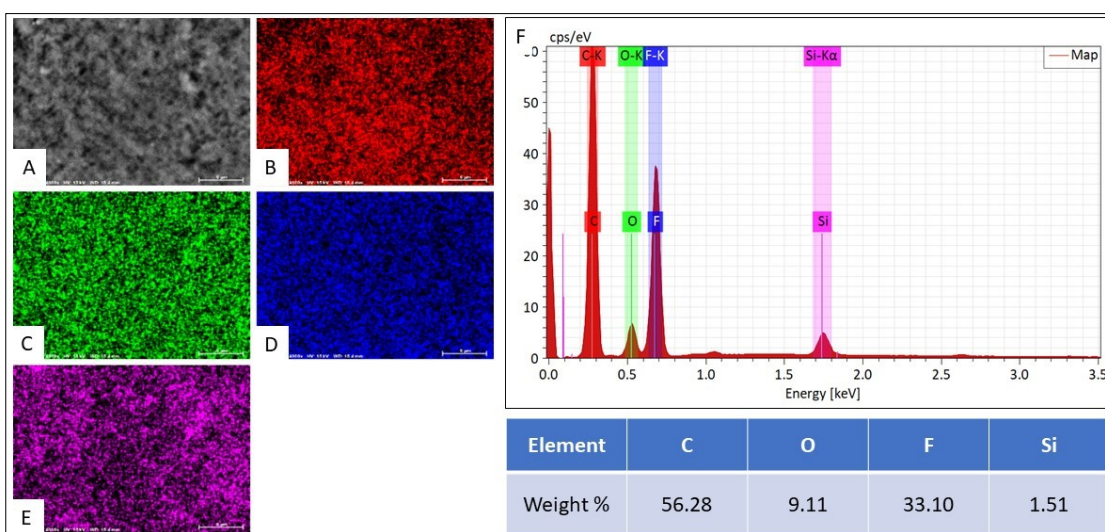

Figure S2 EDX Results of AS Membrane. A. SEM image; B. Carbon(C) Element Mapping; C. Oxygen(O) Element Mapping; D. Fluoride(F) Element Mapping; E. Silicon(Si) Element Mapping; F. EDX Spectrum.
